# Supplementary material for: Driving mechanisms of organic carbon burial in the Early Cretaceous South Atlantic Cape Basin (DSDP Site 361)
Source: Copernicus journal article supplement (doi:10.5194/cp-17-469-2021), 2021-02-19
Supplement: Supplementary file 1 [file cp-17-469-2021-supplement.zip]

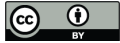

*Supplement of*

**Driving mechanisms of organic carbon burial in the Early  
Cretaceous South Atlantic Cape Basin (DSDP Site 361)**

**Wolf Dummann et al.**

*Correspondence to:* Wolf Dummann ([wdummann@uni-koeln.de](mailto:wdummann@uni-koeln.de))

- [cp-17-469-2021-supplement-title-page.pdf](#)
- [cp-2020-15-supplement-version4](#)
  - [cp2020-15\\_supplement\\_S1.docx](#)
  - [cp2020-15\\_supplement\\_S2.xlsx](#)
  - [cp2020-15\\_supplement\\_S3.xlsx](#)
  - [cp2020-15\\_supplement\\_S4.docx](#)

The copyright of individual parts of the supplement might differ from the CC BY 4.0 License.
